# Supplementary material for: Effect of the Hammett substituent constant of para-substituted benzoic acid on the perovskite/SnO2 interface passivation in perovskite solar cells
Source: Royal Society of Chemistry journal article supplement (doi:10.1039/d4nr02314e), 2024-01-01
Supplement: d4nr02314e1.pdf [file d4nr02314e1.pdf]

*Supporting Information for*

**Effect of Hammett substituent constant of *para*-substituted benzoic acid on the perovskite/SnO<sub>2</sub> interface passivation in perovskite solar cells**

Ki-Nam Hong,<sup>‡a</sup> Sang-Uk Lee,<sup>‡a</sup> Chunyang Zhang,<sup>a</sup> Seong-Ho Cho,<sup>a</sup> and Nam-Gyu Park<sup>\*a,b</sup>

<sup>a</sup>School of Chemical Engineering, Center for Antibonding Regulated Crystals, Sungkyunkwan University, Suwon 16419, Republic of Korea.

<sup>b</sup>SKKU Institute of Energy Science and Technology (SIEST), Sungkyunkwan University, Suwon 16419, Republic of Korea.

<sup>‡</sup>These authors contributed equally to this work.

\*Corresponding author: [npark@skku.edu](mailto:npark@skku.edu)

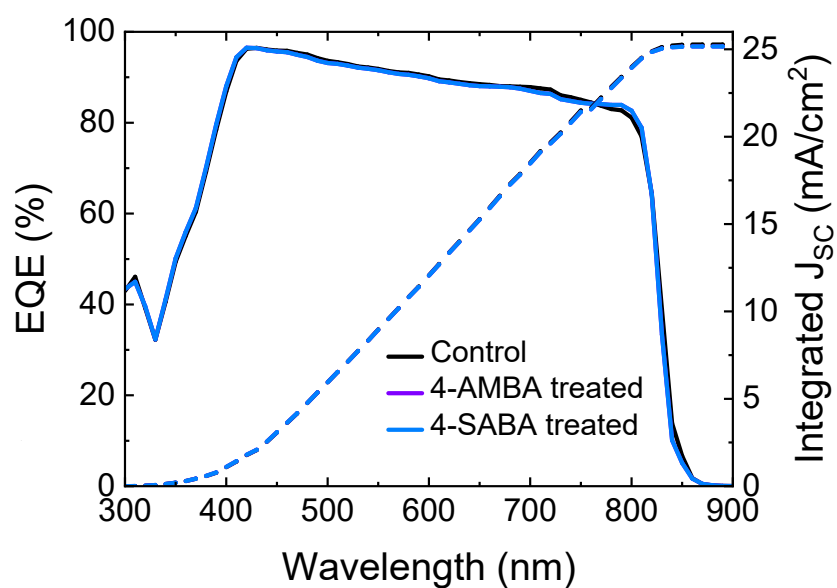

**Figure S1.** EQE spectra with the integrated  $J_{SC}$  for PSCs with the bare  $\text{SnO}_2$  (control), 4-AMBA- and 4-SABA-treated  $\text{SnO}_2$ .

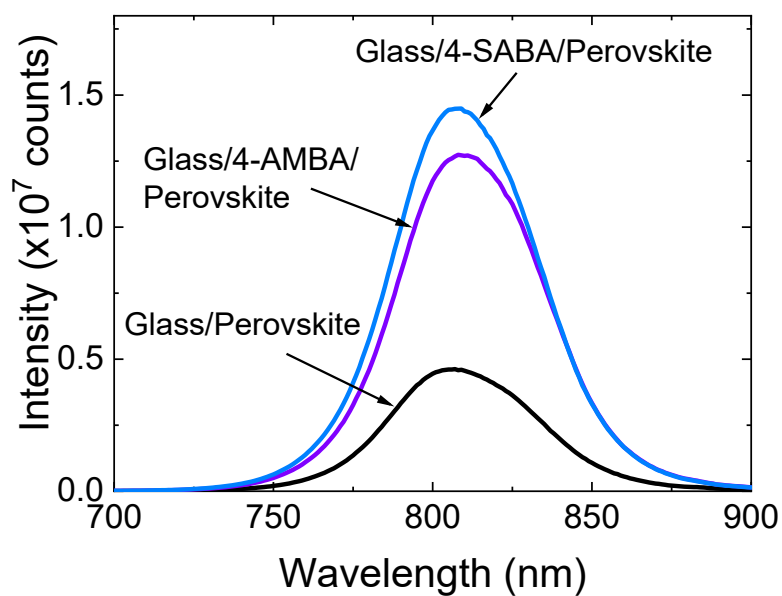

**Figure S2.** SSPL of the perovskite films deposited on glass without and with 4-AMBA and 4-SABA treatment.

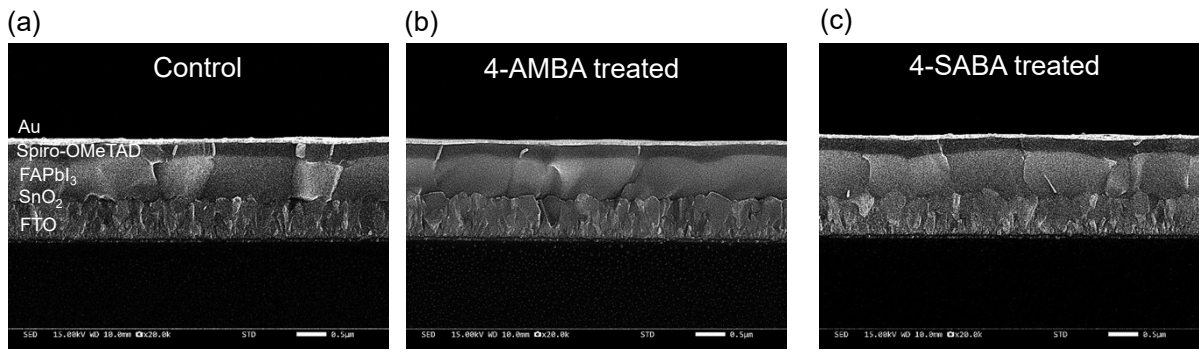

**Figure S3.** Cross-sectional SEM images of full device. (a) FTO/SnO<sub>2</sub>/perovskite/Spiro-OMeTAD/Au. (b) FTO/SnO<sub>2</sub>/4-AMBA/perovskite/Spiro-OMeTAD/Au. (c) FTO/SnO<sub>2</sub>/4-SABA/perovskite/Spiro-OMeTAD/Au.

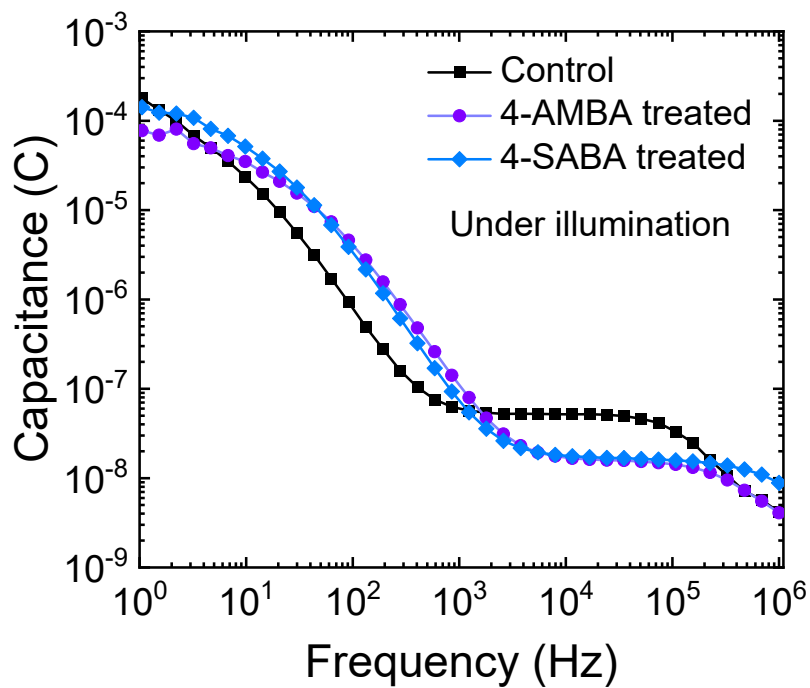

**Figure S4.** Capacitance frequency (C-f) plots of PSCs based on SnO<sub>2</sub>, 4-AMBA-treated SnO<sub>2</sub> and 4-SABA-treated SnO<sub>2</sub>.

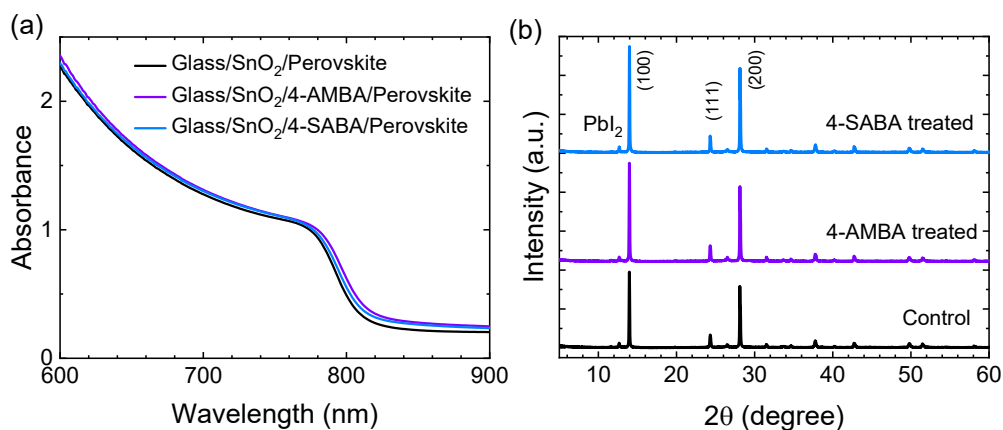

**Figure S5.** (a) UV-vis absorption spectra and (b) XRD patterns of perovskite coated on SnO<sub>2</sub>, 4-AMBA modified SnO<sub>2</sub>, and 4-SABA modified SnO<sub>2</sub>.

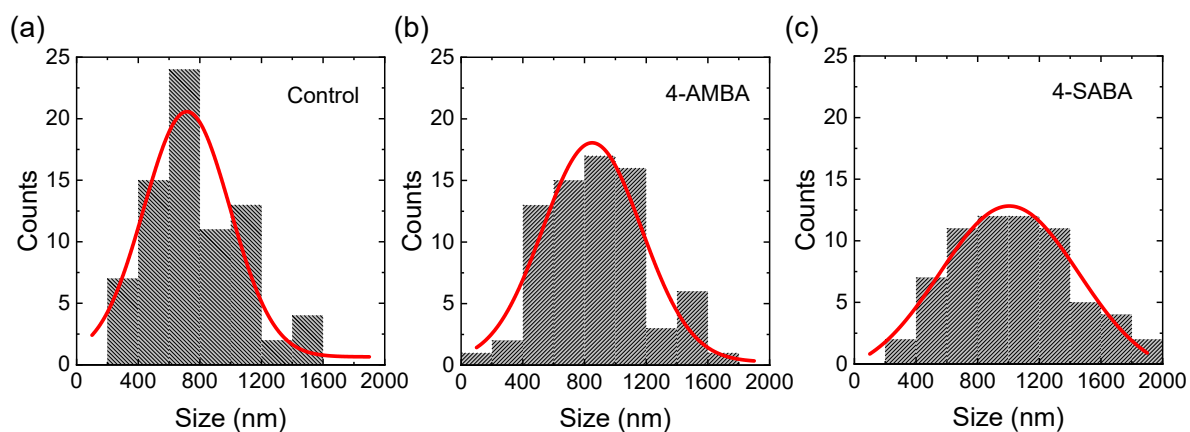

**Figure S6.** Perovskite grain size distribution estimated from the surface SEM image for (a) control, (b) 4-AMBA treated and (c) 4-SABA treated samples.

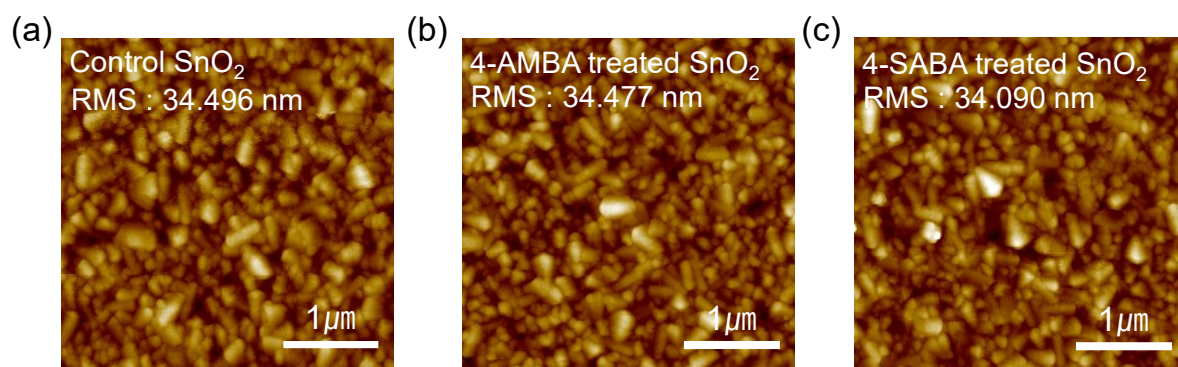

**Figure S7.** AFM images of (a) the bare SnO<sub>2</sub>, (b) the 4-AMBA treated SnO<sub>2</sub> and (c) the 4-SABA treated SnO<sub>2</sub>.

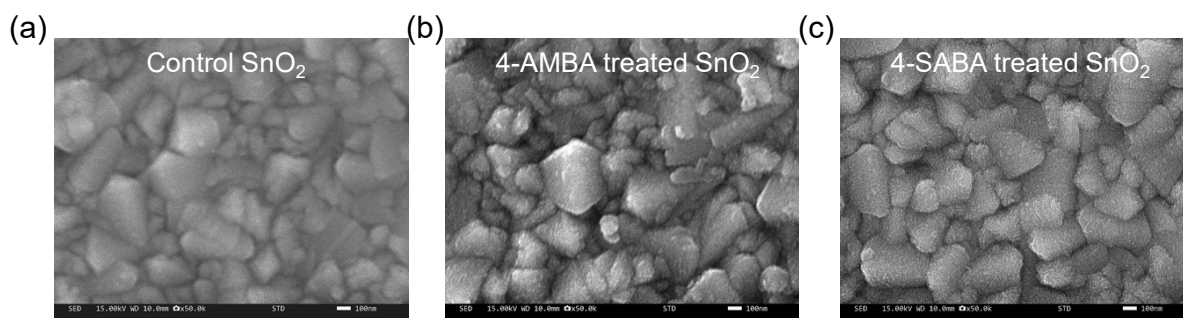

**Figure S8.** Top-view SEM images of (a) the bare SnO<sub>2</sub> (b) the 4-AMBA treated SnO<sub>2</sub> and (c) the 4-SABA treated SnO<sub>2</sub>. SnO<sub>2</sub> was deposited on FTO.

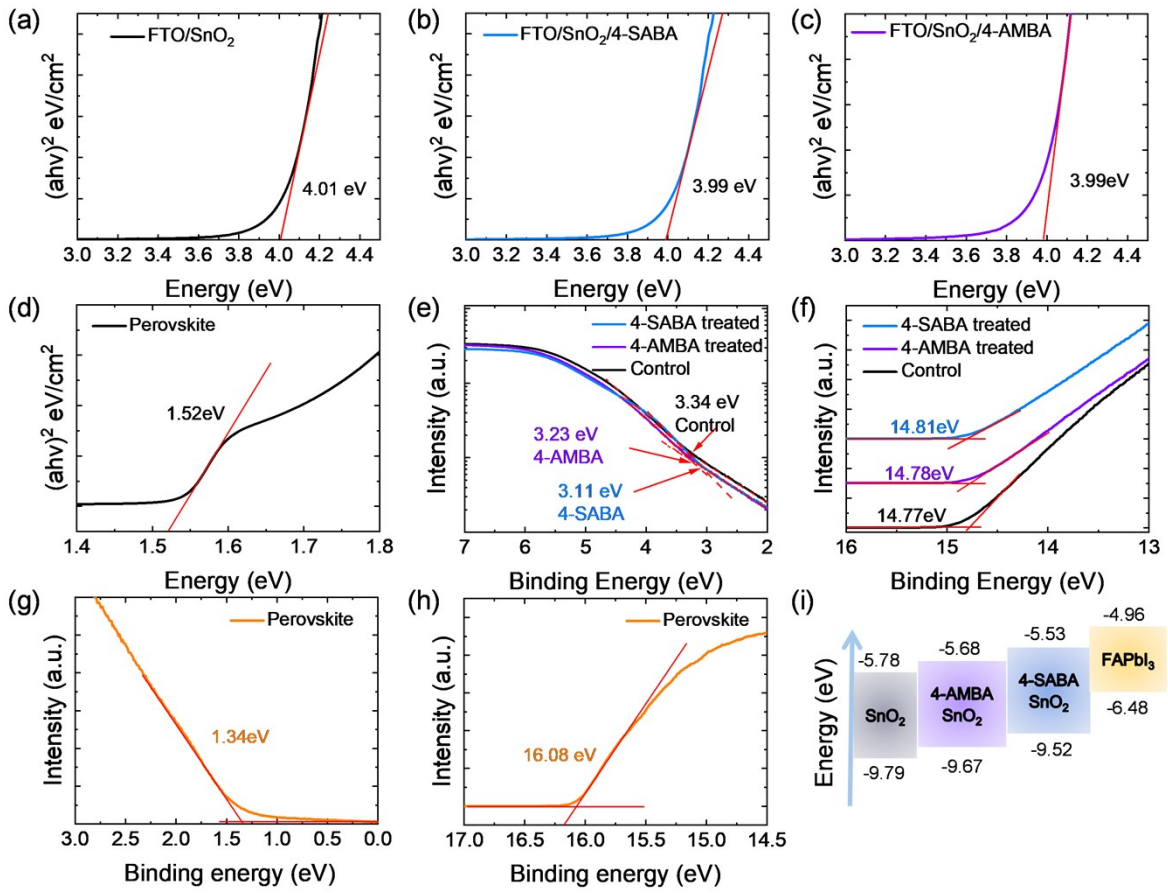

**Figure S9.** Tauc plots for (a) SnO<sub>2</sub> (b) 4-AMBA treated SnO<sub>2</sub> (c) 4-SABA treated SnO<sub>2</sub> and (d) perovskite film. UPS spectra of (e) Fermi edge energy and (f) cut-off energy for SnO<sub>2</sub>, 4-AMBA treated SnO<sub>2</sub> and 4-SABA treated SnO<sub>2</sub>. (g) Fermi edge energy and (h) cut-off energy for perovskite. (i) Schematic illustration of energy level of SnO<sub>2</sub>, 4-AMBA treated SnO<sub>2</sub>, 4-SABA treated SnO<sub>2</sub> and perovskite.

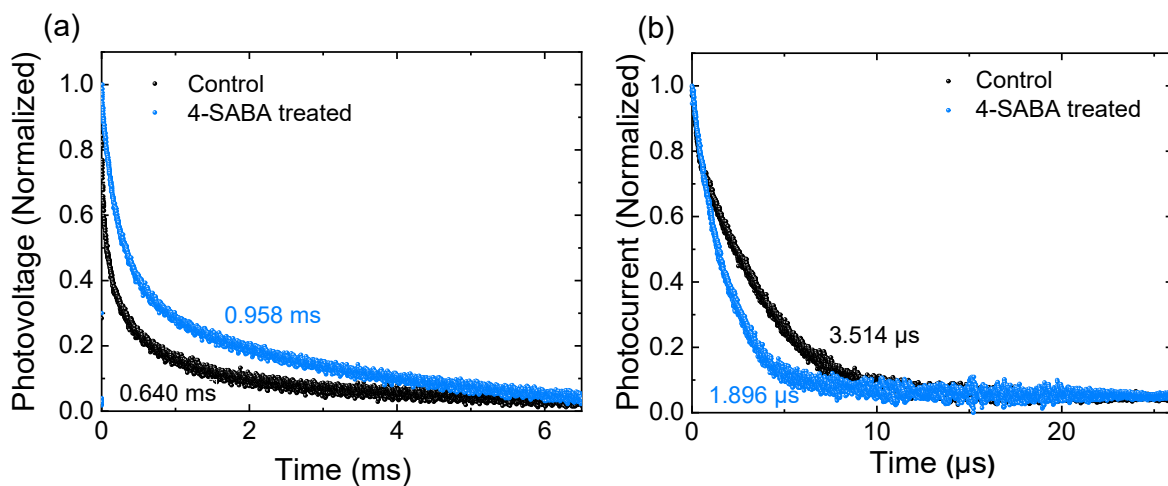

**Figure S10.** (a) TPV and (b) TPC data of device on FTO/SnO<sub>2</sub>/Perovskite/Spiro-OMeTAD/Ag and FTO/SnO<sub>2</sub>/4-SABA/Perovskite/Spiro-OMeTAD/Ag.

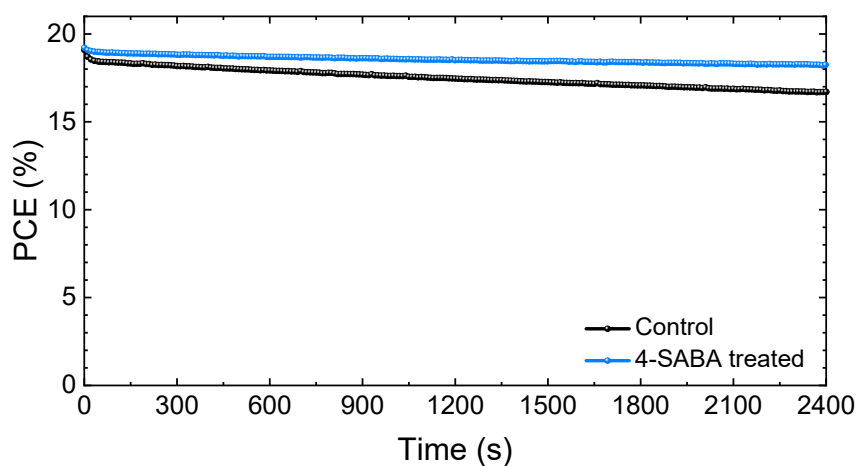

**Figure S11.** SPO of the unencapsulated PSCs employing unmodified and 4-SABA treated SnO<sub>2</sub> obtained by maximum power point tracking under 1 sun.

**Table S1.** Calculated parameters of geometric capacitance (C), trap-filled limited voltage ( $V_{TFL}$ ), dielectric constant ( $\epsilon$ ) and trap density ( $n_t$ ).

| Sample                   | C (F)                   | $V_{TFL}$ (V) | $\epsilon$ | Area (cm <sup>2</sup> ) | $n_t$ (cm <sup>-3</sup> ) |
|--------------------------|-------------------------|---------------|------------|-------------------------|---------------------------|
| SnO <sub>2</sub>         | $5.1796 \times 10^{-8}$ | 1.068         | 147.92     | 0.28                    | $3.48 \times 10^{16}$     |
| SnO <sub>2</sub> /4-AMBA | $1.6902 \times 10^{-8}$ | 1.028         | 48.27      | 0.28                    | $1.09 \times 10^{16}$     |
| SnO <sub>2</sub> /4-SABA | $1.7703 \times 10^{-8}$ | 0.926         | 50.56      | 0.28                    | $1.03 \times 10^{16}$     |

**Table S2.** Fitted results of TRPL curves of the perovskite film deposited on FTO/SnO<sub>2</sub> substrate depending on 4-AMBA or 4-SABA treatment.

| Sample                   | $\tau_1$ (ns) | $A_1$ (%) | $\tau_2$ (ns) | $A_2$ (%) | $\tau_{avg}$ (ns) |
|--------------------------|---------------|-----------|---------------|-----------|-------------------|
| SnO <sub>2</sub>         | 153.12        | 11.77     | 515.74        | 88.23     | 501.93            |
| SnO <sub>2</sub> /4-AMBA | 106.10        | 10.36     | 464.70        | 89.64     | 455.48            |
| SnO <sub>2</sub> /4-SABA | 51.31         | 11.08     | 343.34        | 88.92     | 338.23            |

**Table S3.** Fitted results of UPS data and Tauc plot for estimating  $E_{VB}$  and  $E_{CB}$ .

| Sample                   | $E_{cut-off}$ (eV) | $E_F$ (eV) | $E_{F,edge}$ (eV) | $E_{VB}$ (eV) | $E_g$ (eV) | $E_{CB}$ (eV) |
|--------------------------|--------------------|------------|-------------------|---------------|------------|---------------|
| SnO <sub>2</sub>         | 14.77              | -6.45      | 3.34              | -9.79         | 4.01       | -5.78         |
| SnO <sub>2</sub> /4-AMBA | 14.78              | -6.44      | 3.23              | -9.67         | 3.99       | -5.68         |
| SnO <sub>2</sub> /4-SABA | 14.81              | -6.41      | 3.11              | -9.52         | 3.99       | -5.53         |
| FAPbI <sub>3</sub>       | 16.08              | -5.14      | 1.34              | -6.48         | 1.52       | -4.96         |

**Table S4.** Calculated EIS parameters of the devices with bare SnO<sub>2</sub>, 4-AMBA modified SnO<sub>2</sub>, and 4-SABA modified SnO<sub>2</sub>.

| Sample                   | $R_s$ ( $\Omega cm^2$ ) | $R_{ct}$ ( $\Omega cm^2$ ) | CPE (F)               |
|--------------------------|-------------------------|----------------------------|-----------------------|
| SnO <sub>2</sub>         | 16.02                   | 88.11                      | $1.42 \times 10^{-7}$ |
| SnO <sub>2</sub> /4-AMBA | 12.61                   | 49.63                      | $1.82 \times 10^{-7}$ |
| SnO <sub>2</sub> /4-SABA | 5.92                    | 36.84                      | $6.70 \times 10^{-8}$ |
